# Supplementary material
Source: PubMed Central journal article supplement (PMC2217655)
Supplement: plntcell_tpc.106.050021_1.pdf [file plntcell_tpc.106.050021_1.pdf]

**Supplemental Data. Liu et al. (2007). An ER Stress Response in *Arabidopsis* is Mediated by Proteolytic Processing and Nuclear Relocation of a Membrane-associated Transcription Factor, bZIP28.**

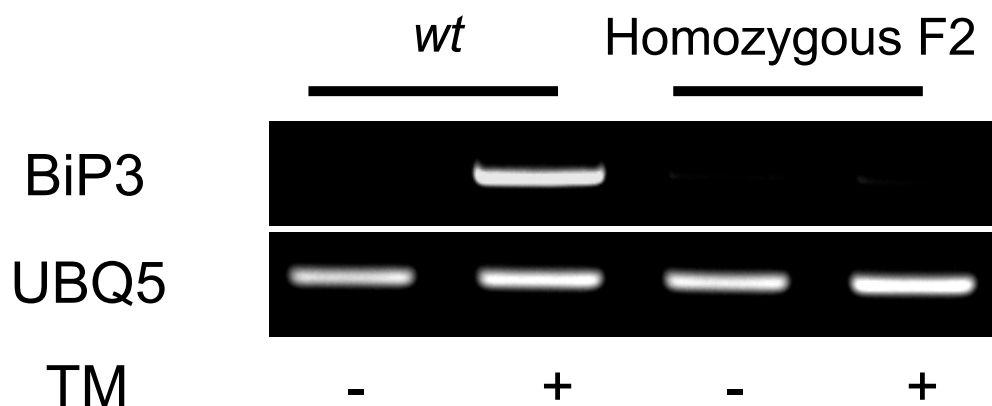

Supplemental Figure 1. Inability to upregulate *BiP3* expression by TM segregates with T-DNA Insertion in *AtbZIP28*.

Homozygous F2 lines derived from a backcross *zip28-2* x *wt* were grouped and tested by RT-PCR for TM-induced *BiP3* expression. Seedlings were treated with 5 g/ml TM for one hour.

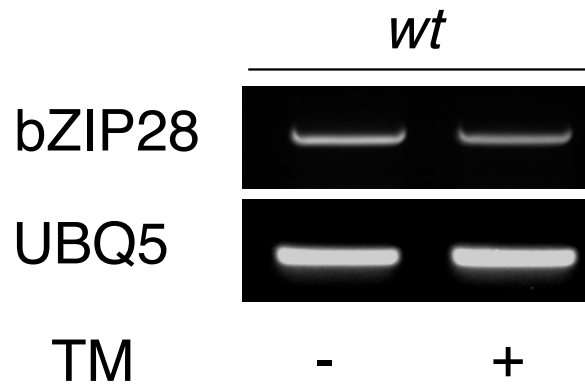

Supplemental Figure 2. *AtbZIP28* Expression is not Upregulated by TM Treatment.

One week old *wt* seedlings were treated with 5 g/ml TM for 4 hr and *AtbZIP28* transcript level was assessed by RT-PCT. (+) indicates treatment, (-) indicates lack of treatment.

Supplemental Table I. Primers used in the current study

| Name      | Purpose                    | Forward primer                                                                                      | Reverse primer                                        |
|-----------|----------------------------|-----------------------------------------------------------------------------------------------------|-------------------------------------------------------|
| Scr285    | Genotyping for SALK_132285 | gttataaacctgtggaaccatcga                                                                            | caactatctctctcaccatgactaa                             |
| Scr659    | Genotyping for SALK_123659 | cgaactacattcatcatacaacaca                                                                           | caactatctctctcaccatgactaa                             |
| qBiP3     | qRT-PCR                    | cacggttccagcgtatttcaat                                                                              | ataagctatggcagcaccctgt                                |
| qBiP1,2   | qRT-PCR                    | tcacttgggaggtgaggacttt                                                                              | ctcacattcccttcggagctta                                |
| qPDIL     | qRT-PCR                    | ctcgtgaagctgagggatttg                                                                               | tgtgcgaaatctaactcagag                                 |
| qCRT1     | qRT-PCR                    | agaccttagctctccaattctc                                                                              | ccattgtaagtaaggatagcatg                               |
| qCNX1     | qRT-PCR                    | atgagacaacggcaactattttcc                                                                            | ccataatcctcatgtccttcaact                              |
| qbZIP28ΔC | qRT-PCR                    | agaccgaagaa ggcagagagt                                                                              | aggctctcttcagagataagt                                 |
| qACT      | qRT-PCR                    | ggtaacattgtgctcagtggttg                                                                             | aacgaccttaattcttcagctgc                               |
| bZIP28    | RT-PCR                     | gaaggcgcgcatgacggaatcaacatccgtggtg                                                                  | ggactagttcaggtggctacgagatggagaccgat                   |
| BiP3      | RT-PCR                     | gctaagacgtcacaatcgatta                                                                              | aaccgactcaaaagaccttcaa                                |
| UBQ5      | RT-PCR                     | ttgaagacggccgtaccctc                                                                                | cgctgaacctttcaagatccatcg                              |
| GUS800    | GUS fusion                 | cccaagcttatttgcaccattcagcttcacgggta                                                                 | cgggatcccgtcggaggattcgaaaatttattct                    |
| OE800     | gene cloning               | gaaggcgcgcatgacggaatcaacatccgtggtg                                                                  | ggactagttcaggtggctacgagatggagaccgat                   |
| GFP-AscI  | GFP tagging                | gaaggcgcgcatgagtaaaggagaagaacttttca                                                                 | gaaggcgcgacctttgtatagttcatccatgccatg                  |
| CFP-ER    | ER CFP marker              | taccgggatgaagactaatcttttctctttctcat<br>cttttcaactctctatcattatcctcggccgaattc<br>gtgagcaagggcgaggagct | cgggatccttactagagctcatcgtgcttgtaacagctcgtcca<br>tgccg |
| MYC-AscI  | MYC tagging                | gaaggcgcgcatggaacagaaattaatctctgaag                                                                 | gaaggcgcgccaaggtctcttctcagagataagttt                  |
| OE800ΔC   | expression                 | gaaggcgcgcatgacggaatcaacatccgtggtg                                                                  | ggactagtaaccttcttgacttacttttacc                       |
